# Supplementary material
Source: PubMed Central journal article supplement (PMC8488019)
Supplement: NIHMS1735545-supplement-2.pdf [file NIHMS1735545-supplement-2.pdf]

**Table S1. Datasets.** Functional analyses were performed on eight main and 14 additional datasets. For the main datasets, activity traces were extracted for all identifiable neurons. For the 14 additional datasets, only neurons of interest were tracked. \* – main datasets; \*\* – 203 is a partial dataset extended for the neuron-neuron and neuron-behavior correlation analyses presented in [Figure 3L](#) and [Table S5](#).

| Index | Male                 | Hermaphrodite | Description                                                                                                                                                                                  |
|-------|----------------------|---------------|----------------------------------------------------------------------------------------------------------------------------------------------------------------------------------------------|
| 109*  | ZM9624               | OH11119       | Includes searching, courtship, copulation, and resting. 56 identified cells tracked across 2719 volumes (543 seconds).                                                                       |
| 153*  | ZM9624               | ADS1006       | Includes searching, courtship, copulation, and resting. 68 identified cells tracked across 1325 volumes (265 seconds).                                                                       |
| 185*  | ZM9624               | ADS1013       | Includes searching and courtship. 62 identified cells tracked across 2976 volumes (595 seconds).                                                                                             |
| 137*  | ZM9624               | ADS1006       | Includes searching and courtship. 66 identified cells tracked across 1294 volumes (258 seconds).                                                                                             |
| 182*  | ZM9624               | ADS1013       | Includes searching, courtship, copulation, and resting. 57 identified cells tracked across 2977 volumes (595 seconds).                                                                       |
| 184*  | ZM9624               | ADS1006       | Includes searching, courtship, copulation, and resting. 61 identified cells tracked across 3000 volumes (600 seconds).                                                                       |
| 714*  | ZM9624               | ADS1006       | Includes courtship, copulation, and resting. 54 identified cells tracked across 2472 volumes (494 seconds).                                                                                  |
| 2457* | ZM9624               | BB92          | Includes searching, courtship, copulation, and resting. 51 identified cells tracked across 2901 volumes (580 seconds).                                                                       |
| 205   | ZM9624               | ADS1006       | Includes searching, courtship. 15 identified cells tracked across 1332 volumes (266 seconds).                                                                                                |
| 264   | ADS1002 x<br>OH13105 | ADS1006       | Includes courtship, copulation, and resting. 15 identified cells tracked across 450 volumes (90 seconds).                                                                                    |
| 262   | ADS1002 x<br>OH13105 | ADS1006       | Includes searching, courtship, copulation, and resting. 16 identified cells tracked across 1060 volumes (212 seconds).                                                                       |
| 260   | ADS1002 x<br>OH13105 | ADS1006       | Includes courtship. 5 identified cells tracked across 355 volumes (71 seconds).                                                                                                              |
| 258   | ADS1002 x<br>OH13105 | ADS1006       | Includes courtship. 2 identified cells tracked across 181 volumes (36 seconds).                                                                                                              |
| 300   | ZM9624               | ADS1003       | Includes courtship. 13 identified cells tracked across 1630 volumes (326 seconds).                                                                                                           |
| 263   | ADS1002 x<br>OH13645 | ADS1006       | Includes courtship. 3 identified cells tracked across 651 volumes (130 seconds).                                                                                                             |
| 277   | ADS1002 x<br>OH13645 | ADS1006       | Includes courtship. 3 identified cells tracked across 950 volumes (160 seconds).                                                                                                             |
| 203** | ZM9624               | ADS1006       | Includes courtship, copulation, and resting. 33 identified cells tracked across 2083 volumes (416 seconds) + additional 16 cells tracked for a part of courtship and copulation and resting. |
| 259   | ADS1002 x<br>OH13645 | ADS1006       | Includes courtship. 2 identified cells tracked across 1530 volumes (306 seconds).                                                                                                            |
| 183   | ZM9624               | ADS1006       | Includes courtship. 14 identified cells tracked across 597 volumes (119 seconds).                                                                                                            |
| 1851  | ZM9624               | BB92          | Includes searching, courtship. 18 identified cells tracked across 917 volumes (183 seconds).                                                                                                 |
| 1852  | ZM9624               | BB92          | Includes searching, courtship. 10 identified cells tracked across 913 volumes (182 seconds).                                                                                                 |
| 2455  | ZM9624               | BB92          | Includes searching, courtship, copulation, and resting. 17 identified cells tracked across 887 volumes (177 seconds).                                                                        |

**Table S2. Neuron identification. Related to Figure 1.** 57 neuron types and the intestinal cell nucleus int9R were identified based on their morphology, position, and expression of specific fluorescent markers. 's' – sensory neuron, 'i' – interneuron, 'm' – motoneuron. Confidence scores: \*\*\* certain, \*\* confident, \* probable.

| Neuron ID | Neuron type | Identification criteria                                                                                      | Confidence score | Comments                                                           |
|-----------|-------------|--------------------------------------------------------------------------------------------------------------|------------------|--------------------------------------------------------------------|
| AS10      | m           | unc-47 expression (OH13105), unc-17 expression (LX929), (RM3325), position                                   | **               |                                                                    |
| AS11      | m           | unc-47 expression (OH13105), unc-17 expression (LX929), (RM3325), position                                   | ***              |                                                                    |
| CA08      | m           | Weak unc-47 expression (OH13105), position                                                                   | ***              |                                                                    |
| CA09      | m           | Weak unc-47 expression (OH13105), no unc-25 expression (CZ13799), position                                   | ***              |                                                                    |
| CP08      | i           | Weak unc-47 expression (OH13105), position                                                                   | *                |                                                                    |
| CP09      | i           | Strong unc-47 expression (OH13105), no unc-17 expression (RM3325), position                                  | ***              |                                                                    |
| DA07      | m           | unc-129 expression (OH12930), position                                                                       | **               |                                                                    |
| DB07      | m           | unc-129 expression (OH12930), position                                                                       | ***              |                                                                    |
| DD06      | m           | Strong unc-47 expression (OH13105), strong unc-25 expression (CZ13799), cho-1 expression (OH13646), position | ***              |                                                                    |
| DVA       | s, i        | No eat-4 expression, position                                                                                | *                |                                                                    |
| DVB       | i, m        | Expression of DVB marker OH15097, activity, position                                                         | ***              |                                                                    |
| DX1       | i           | Morphology, position, no unc-47 expression (OH13105)                                                         | **               |                                                                    |
| DX2       | i           | Morphology, position, no unc-47 expression (OH13105)                                                         | **               |                                                                    |
| DX3/4     | i           | Morphology, position                                                                                         | **               |                                                                    |
| EF1       | i           | Strong unc-47 expression (OH13105), position                                                                 | ***              | EF1 is considered anterior to EF2                                  |
| EF2       | i           | Strong unc-47 expression (OH13105), position                                                                 | ***              |                                                                    |
| EF3       | i           | Strong unc-47 expression (OH13105), no cho-1 expression (OH13646), position                                  | ***              |                                                                    |
| HOA       | s           | Strong eat-4 expression (OH13645), position                                                                  | ***              |                                                                    |
| HOB       | s           | pkd-2 expression (MT11318), position                                                                         | ***              |                                                                    |
| int9R     |             | Morphology – nucleus localizes to int9R, gtl-1 expression (CG460)                                            | ***              | Intestinal cell                                                    |
| PCAL/R    | s, m        | Strong eat-4 expression (OH13645)                                                                            | ***              |                                                                    |
| PCBL/R    | s, m        | Strong unc-47 expression (OH13105), position                                                                 | ***              |                                                                    |
| PCCL/R    | s, m        | Strong unc-47 expression (OH13105), position                                                                 | ***              |                                                                    |
| PDA       | m           | position                                                                                                     | *                |                                                                    |
| PDB       | i, m        | kal-1 expression (OH904), unc-47 expression (OH13105), position                                              | ***              |                                                                    |
| PDC       | i, m        | Morphology, unc-47 expression (OH13105), position                                                            | ***              |                                                                    |
| PGA       | i           | unc-47 expression (OH13105), no cho-1 expression (OH13646), position                                         | **               |                                                                    |
| PHAL/R    | s           | Lipophilic dye uptake, srg-13 expression (BC12695), no gpa-6 expression (NL1603), position                   | ***              | Unlike in the hermaphrodite, in the male PHA lies posterior to PHB |
| PHBL/R    | s           | Lipophilic dye uptake, gpa-6 expression (NL1603), no srg-13 expression (BC12695), position                   | **               |                                                                    |
| PHCL/R    | s           | Strong eat-4 expression (OH13645), dop-1 expression (OH2411), ida-1 expression (BL5717), position            | ***              |                                                                    |
| PHDL/R    | s           | Strong unc-17 expression (LX929), (RM3325), position                                                         | ***              |                                                                    |
| PLML/R    | s           | mec-4 expression (QW1068), dop-1 expression (OH1960), position                                               | ***              |                                                                    |
| PVPR      | i           | No unc-47 expression (OH13105), position                                                                     | *                |                                                                    |

| Neuron ID | Neuron type | Identification criteria                                                                                                     | Confidence score | Comments                                                                   |
|-----------|-------------|-----------------------------------------------------------------------------------------------------------------------------|------------------|----------------------------------------------------------------------------|
| PVT       | i           | Expression of PVT marker OH15097, no cho-1 expression (OH13646), position                                                   | ***              | PVT appears on the right side of the male, unlike in Sulston et al., 1980. |
| PVV       | i, m        | Strong eat-4 expression (OH13645), position                                                                                 | ***              |                                                                            |
| PVX       | i           | Morphology, nlp-14 expression (HA353), position                                                                             | ***              |                                                                            |
| PVY       | i           | Morphology, position                                                                                                        | ***              |                                                                            |
| PVZ       | i, m        | unc-47 expression (OH13105), cho-1 expression (OH13646), position                                                           | **               |                                                                            |
| R1AL/R    | s           | No expression of pkd-2 (MT11318), nucleus morphology, position                                                              | ***              |                                                                            |
| R1BL/R    | s           | Expression of pkd-2 (MT11318), nucleus morphology, position                                                                 | ***              |                                                                            |
| R2AL/R    | s           | No expression of pkd-2 (MT11318), nucleus morphology, position                                                              | ***              |                                                                            |
| R2BL/R    | s           | Expression of pkd-2 (MT11318), nucleus morphology, weak eat4 expression (OH13645), no unc-47 expression (OH13105), position | ***              |                                                                            |
| R3AL/R    | s           | trp-4 expression (OH10235), unc-47 expression (OH13105), cho-1 expression (OH13646), position                               | *                |                                                                            |
| R4AL/R    | s           | No sto-3 expression (QW1876), position                                                                                      | **               |                                                                            |
| R6AL/R    | s           | trp-4 expression (OH10235), position                                                                                        | ***              |                                                                            |
| R8BL/R    | s           | sto-3 expression (QW1876), no unc-47 expression (OH13105), position                                                         | ***              |                                                                            |
| R9BL/R    | s           | unc-47 expression (OH13105), position                                                                                       | **               |                                                                            |
| SPCL/R    | s, m        | position                                                                                                                    | ***              |                                                                            |
| SPDL/R    | s, m        | position                                                                                                                    | **               |                                                                            |
| SPVL/R    | s           | position                                                                                                                    | **               |                                                                            |
| VA10      | m           | unc-17 expression (RM3325)                                                                                                  | ***              |                                                                            |
| VA11      | m           | unc-17 expression (RM3325), no unc-47 expression (OH13105), position                                                        | ***              |                                                                            |
| VA12      | m           | cho-1 expression (OH13646), position                                                                                        | *                |                                                                            |
| VB11      | m           | unc-17 expression (RM3325), position, activity                                                                              | ***              |                                                                            |
| VD11      | m           | Strong unc-47 expression (OH13105), strong unc-25 expression (CZ13799), position                                            | ***              |                                                                            |
| VD12      | m           | Strong unc-47 expression (OH13105), strong unc-25 expression (CZ13799), position                                            | ***              |                                                                            |
| VD13      | m           | Strong unc-47 expression (OH13105), strong unc-25 expression (CZ13799), position                                            | **               |                                                                            |

**Table S3. Predicting continuous behavioral features from neuronal activities. Related to Figure 2.** Prediction accuracy ( $R^2$ ) for models built and tested using all neurons.  $R^2$  values were obtained from fitting predictions to the observed continuous features from each left-out dataset.

| Behavioral feature | Dataset index |      |      |      |      |      |      |      |
|--------------------|---------------|------|------|------|------|------|------|------|
|                    | 109           | 153  | 185  | 137  | 182  | 184  | 714  | 2457 |
| Velocity           | 0.33          | 0.36 | 0.43 | 0.61 | 0.11 | 0.52 | 0.28 | 0.45 |
| Tail Curvature     | 0.24          | 0.38 | 0.37 | 0.13 | 0.52 | 0.22 | 0.46 | 0.23 |
| Sliding velocity   | 0.24          | 0.27 | 0.42 | 0.41 | 0.02 | 0.56 | 0.19 | 0.33 |
| Distance to tips   | 0.36          | 0.21 | 0.35 | 0.24 | 0.35 | 0.38 | 0.19 | 0.36 |
| Distance to vulva  | 0.31          | 0.5  | 0.42 | 0.25 | 0.4  | 0.49 | 0.12 | 0.36 |
| Spicules           | 0.36          | 0.6  | 0.04 | 0.04 | 0    | 0.36 | 0.16 | 0.13 |

**Table S4. Predicting continuous behaviors from partial neuronal activity sets. Related to Figure 2.** For each continuous behavioral feature, individual neurons were ranked by their importance for predicting those features. In each row of the table corresponding to neuron  $A$ , mean  $R^2$  values are shown as follows:  $R_k^2$  – models built using activities of neuron  $A$ ;  $R_e^2$  – models built using activities of all neurons except neuron  $A$ ;  $R_{sA}^2$  – models built by using activity of neuron  $A$  and activities all neurons with a higher rank;  $R_{se}^2$  – models built by using activities of neurons whose ranks are lower than the rank of  $A$ .

| Rank        | Velocity          |         |         |            | Tail curvature    |      |         |         | Sliding velocity  |            |      |         | Distance to tips  |            |            |      | Distance to vulva |         |            |            | Spicules          |         |         |            |            |      |         |         |            |            |
|-------------|-------------------|---------|---------|------------|-------------------|------|---------|---------|-------------------|------------|------|---------|-------------------|------------|------------|------|-------------------|---------|------------|------------|-------------------|---------|---------|------------|------------|------|---------|---------|------------|------------|
| All neurons | Mean $R^2 = 0.39$ |         |         |            | Mean $R^2 = 0.32$ |      |         |         | Mean $R^2 = 0.30$ |            |      |         | Mean $R^2 = 0.31$ |            |            |      | Mean $R^2 = 0.36$ |         |            |            | Mean $R^2 = 0.21$ |         |         |            |            |      |         |         |            |            |
|             | ID                | $R_k^2$ | $R_e^2$ | $R_{sA}^2$ | $R_{se}^2$        | ID   | $R_k^2$ | $R_e^2$ | $R_{sA}^2$        | $R_{se}^2$ | ID   | $R_k^2$ | $R_e^2$           | $R_{sA}^2$ | $R_{se}^2$ | ID   | $R_k^2$           | $R_e^2$ | $R_{sA}^2$ | $R_{se}^2$ | ID                | $R_k^2$ | $R_e^2$ | $R_{sA}^2$ | $R_{se}^2$ | ID   | $R_k^2$ | $R_e^2$ | $R_{sA}^2$ | $R_{se}^2$ |
| 1           | PHC               | 0.25    | 0.38    | 0.25       | 0.39              | VA11 | 0.02    | 0.3     | 0.02              | 0.32       | PHC  | 0.18    | 0.25              | 0.18       | 0.3        | PVV  | 0.22              | 0.24    | 0.22       | 0.31       | PCB               | 0.27    | 0.36    | 0.27       | 0.36       | SPC  | 0.23    | 0.19    | 0.23       | 0.21       |
| 2           | PVY               | 0.03    | 0.38    | 0.27       | 0.38              | AS11 | 0.03    | 0.31    | 0.07              | 0.3        | PVX  | 0.02    | 0.28              | 0.21       | 0.25       | VB11 | 0.01              | 0.31    | 0.2        | 0.24       | PVX               | 0.21    | 0.34    | 0.27       | 0.36       | AS11 | 0.03    | 0.21    | 0.23       | 0.2        |
| 3           | DB07              | 0.17    | 0.37    | 0.33       | 0.38              | PVZ  | 0.06    | 0.31    | 0.05              | 0.29       | PCA  | 0.16    | 0.29              | 0.27       | 0.24       | AS11 | 0.04              | 0.3     | 0.21       | 0.24       | PVY               | 0.13    | 0.35    | 0.34       | 0.35       | HOA  | 0.19    | 0.21    | 0.37       | 0.19       |
| 4           | VB11              | 0.12    | 0.37    | 0.36       | 0.36              | PVY  | 0.03    | 0.3     | 0.15              | 0.29       | AS11 | 0.1     | 0.3               | 0.28       | 0.19       | EF2  | 0.2               | 0.31    | 0.31       | 0.23       | PHA               | 0.04    | 0.35    | 0.37       | 0.34       | CA08 | 0.05    | 0.21    | 0.37       | 0.2        |
| 5           | DA07              | 0.14    | 0.39    | 0.38       | 0.33              | AS10 | 0.03    | 0.31    | 0.17              | 0.28       | VB11 | 0.1     | 0.3               | 0.29       | 0.18       | PLM  | 0.08              | 0.29    | 0.32       | 0.23       | HOA               | 0.26    | 0.37    | 0.36       | 0.33       | VB11 | 0.34    | 0.21    | 0.37       | 0.2        |
| 6           | PVPR              | 0.06    | 0.37    | 0.38       | 0.33              | PVX  | 0.09    | 0.31    | 0.2               | 0.27       | PVY  | 0.06    | 0.29              | 0.32       | 0.17       | PCB  | 0.05              | 0.3     | 0.32       | 0.23       | VA12              | 0.13    | 0.33    | 0.37       | 0.34       | VA11 | 0.08    | 0.22    | 0.37       | 0.19       |
| 7           | DD06              | 0.01    | 0.39    | 0.38       | 0.32              | R3A  | 0.08    | 0.32    | 0.19              | 0.26       | SPC  | 0.03    | 0.31              | 0.32       | 0.16       | PVT  | 0.08              | 0.31    | 0.32       | 0.22       | VB11              | 0.04    | 0.33    | 0.36       | 0.31       | PVY  | 0.12    | 0.21    | 0.37       | 0.2        |
| 8           | AS11              | 0.21    | 0.39    | 0.38       | 0.31              | DA07 | 0.07    | 0.32    | 0.21              | 0.26       | PVT  | 0.06    | 0.3               | 0.32       | 0.16       | HOA  | 0.17              | 0.3     | 0.35       | 0.22       | AS10              | 0.17    | 0.35    | 0.36       | 0.27       | CA09 | 0.01    | 0.21    | 0.35       | 0.2        |
| 9           | VA12              | 0.05    | 0.39    | 0.38       | 0.32              | VA12 | 0.03    | 0.3     | 0.22              | 0.26       | AS10 | 0.04    | 0.31              | 0.32       | 0.16       | R4A  | 0.1               | 0.29    | 0.37       | 0.22       | HOB               | 0.03    | 0.35    | 0.37       | 0.25       | EF2  | 0.03    | 0.22    | 0.34       | 0.16       |
| 10          | EF2               | 0.17    | 0.37    | 0.39       | 0.3               | DB07 | 0.02    | 0.31    | 0.21              | 0.24       | DVB  | 0.04    | 0.31              | 0.33       | 0.17       | DA07 | 0.02              | 0.3     | 0.37       | 0.19       | PVY               | 0.11    | 0.35    | 0.38       | 0.23       | R4A  | 0.03    | 0.21    | 0.34       | 0.16       |
| 11          | VA11              | 0.15    | 0.39    | 0.4        | 0.29              | PVY  | 0.1     | 0.31    | 0.25              | 0.23       | DD06 | 0.03    | 0.3               | 0.33       | 0.17       | DX2  | 0.1               | 0.31    | 0.38       | 0.19       | PCC               | 0.1     | 0.36    | 0.37       | 0.23       | AS10 | 0.04    | 0.21    | 0.34       | 0.17       |
| 12          | EF1               | 0.13    | 0.39    | 0.39       | 0.28              | VB11 | 0.02    | 0.32    | 0.25              | 0.21       | PVZ  | 0.05    | 0.31              | 0.33       | 0.17       | HOB  | 0.09              | 0.31    | 0.38       | 0.19       | DB07              | 0.13    | 0.35    | 0.39       | 0.23       | PVZ  | 0.05    | 0.2     | 0.34       | 0.17       |
| 13          | PVT               | 0.12    | 0.39    | 0.39       | 0.27              | PLM  | 0.02    | 0.32    | 0.25              | 0.21       | EF1  | 0.03    | 0.31              | 0.33       | 0.16       | PHA  | 0.02              | 0.29    | 0.38       | 0.17       | PVPR              | 0.05    | 0.36    | 0.39       | 0.23       | PGA  | 0.32    | 0.21    | 0.32       | 0.16       |
| 14          | PCA               | 0.09    | 0.39    | 0.39       | 0.27              | DD06 | 0.06    | 0.32    | 0.23              | 0.21       | R9B  | 0.07    | 0.31              | 0.33       | 0.17       | SPC  | 0.1               | 0.3     | 0.4        | 0.16       | DD06              | 0.04    | 0.36    | 0.38       | 0.22       | PCB  | 0.12    | 0.23    | 0.32       | 0.13       |
| 15          | R2A               | 0.12    | 0.39    | 0.39       | 0.28              | R4A  | 0.02    | 0.32    | 0.23              | 0.2        | VD12 | 0.02    | 0.31              | 0.33       | 0.17       | PDB  | 0.02              | 0.31    | 0.4        | 0.16       | DA07              | 0.08    | 0.36    | 0.38       | 0.22       | PVT  | 0.08    | 0.21    | 0.32       | 0.14       |
| 16          | R6A               | 0.11    | 0.39    | 0.38       | 0.28              | EF2  | 0.01    | 0.32    | 0.24              | 0.2        | VA12 | 0.03    | 0.31              | 0.33       | 0.17       | PGA  | 0.01              | 0.31    | 0.4        | 0.16       | PVT               | 0.11    | 0.36    | 0.38       | 0.23       | DD06 | 0.1     | 0.21    | 0.32       | 0.14       |
| 17          | im9R              | 0.01    | 0.39    | 0.38       | 0.28              | PDB  | 0.07    | 0.32    | 0.26              | 0.21       | PVY  | 0       | 0.31              | 0.32       | 0.17       | VA12 | 0.02              | 0.31    | 0.39       | 0.16       | DX2               | 0.06    | 0.36    | 0.39       | 0.24       | R6A  | 0.05    | 0.21    | 0.33       | 0.14       |
| 18          | AS10              | 0.03    | 0.39    | 0.38       | 0.28              | DVB  | 0.04    | 0.32    | 0.27              | 0.2        | RIAR | 0.13    | 0.31              | 0.32       | 0.18       | R2A  | 0.11              | 0.31    | 0.39       | 0.16       | PGA               | 0.06    | 0.36    | 0.39       | 0.24       | PHA  | 0.06    | 0.21    | 0.33       | 0.13       |
| 19          | DVA               | 0.19    | 0.38    | 0.38       | 0.28              | PHA  | 0.02    | 0.32    | 0.27              | 0.18       | HOA  | 0.04    | 0.31              | 0.32       | 0.15       | VD11 | 0.03              | 0.3     | 0.38       | 0.15       | PDA               | 0.02    | 0.36    | 0.39       | 0.25       | R9B  | 0.12    | 0.21    | 0.33       | 0.13       |
| 20          | PVY               | 0.06    | 0.39    | 0.39       | 0.25              | VA10 | 0.1     | 0.32    | 0.28              | 0.18       | CA08 | 0.06    | 0.31              | 0.32       | 0.15       | PCC  | 0.05              | 0.31    | 0.38       | 0.13       | R4A               | 0.09    | 0.36    | 0.37       | 0.24       | DVB  | 0.21    | 0.22    | 0.32       | 0.12       |
| 21          | PHA               | 0.04    | 0.39    | 0.38       | 0.25              | PCA  | 0.03    | 0.32    | 0.29              | 0.18       | DVA  | 0.07    | 0.3               | 0.32       | 0.15       | AS10 | 0.08              | 0.31    | 0.38       | 0.14       | CA08              | 0.04    | 0.36    | 0.37       | 0.23       | SPD  | 0.04    | 0.21    | 0.32       | 0.08       |
| 22          | PGA               | 0.02    | 0.39    | 0.38       | 0.25              | DVA  | 0.02    | 0.32    | 0.28              | 0.18       | EF2  | 0.07    | 0.31              | 0.32       | 0.14       | PHD  | 0.01              | 0.3     | 0.38       | 0.14       | PHC               | 0.04    | 0.35    | 0.38       | 0.23       | PVX  | 0.02    | 0.21    | 0.31       | 0.07       |
| 23          | SPC               | 0.13    | 0.38    | 0.39       | 0.25              | R9B  | 0.02    | 0.32    | 0.28              | 0.18       | PGA  | 0.03    | 0.31              | 0.31       | 0.14       | PVX  | 0.11              | 0.3     | 0.38       | 0.13       | R1B               | 0.02    | 0.35    | 0.38       | 0.23       | PCC  | 0.06    | 0.21    | 0.31       | 0.07       |
| 24          | VD11              | 0.17    | 0.39    | 0.39       | 0.24              | PCB  | 0.03    | 0.32    | 0.28              | 0.17       | SPD  | 0.03    | 0.31              | 0.31       | 0.14       | CA09 | 0.02              | 0.31    | 0.38       | 0.13       | DVA               | 0.09    | 0.35    | 0.39       | 0.22       | PCA  | 0.08    | 0.22    | 0.31       | 0.07       |
| 25          | R9B               | 0.13    | 0.37    | 0.4        | 0.23              | R1AL | 0.03    | 0.32    | 0.28              | 0.17       | PCB  | 0.03    | 0.3               | 0.32       | 0.14       | DVA  | 0.05              | 0.32    | 0.38       | 0.14       | R9B               | 0.1     | 0.36    | 0.39       | 0.2        | PDB  | 0.03    | 0.22    | 0.31       | 0.1        |
| 26          | PDA               | 0.06    | 0.39    | 0.4        | 0.19              | PHC  | 0.03    | 0.32    | 0.28              | 0.17       | DX2  | 0.08    | 0.28              | 0.34       | 0.14       | VD12 | 0.08              | 0.31    | 0.37       | 0.14       | PVZ               | 0.03    | 0.36    | 0.4        | 0.21       | RIAR | 0.03    | 0.22    | 0.31       | 0.1        |
| 27          | RIAR              | 0.03    | 0.37    | 0.41       | 0.19              | EF3  | 0.01    | 0.32    | 0.28              | 0.17       | R3A  | 0.04    | 0.31              | 0.34       | 0.11       | PVY  | 0.02              | 0.31    | 0.35       | 0.15       | CA09              | 0.21    | 0.35    | 0.41       | 0.21       | DX2  | 0.02    | 0.21    | 0.3        | 0.1        |
| 28          | R4A               | 0.14    | 0.39    | 0.41       | 0.16              | VD13 | 0.1     | 0.29    | 0.31              | 0.18       | PVPR | 0.01    | 0.3               | 0.34       | 0.09       | PHC  | 0.07              | 0.3     | 0.35       | 0.15       | PDB               | 0.1     | 0.36    | 0.41       | 0.19       | RIAL | 0.02    | 0.21    | 0.29       | 0.11       |
| 29          | PVX               | 0.09    | 0.39    | 0.41       | 0.15              | im9R | 0.04    | 0.32    | 0.31              | 0.13       | im9R | 0.01    | 0.31              | 0.34       | 0.08       | PVPR | 0.03              | 0.31    | 0.35       | 0.15       | SPC               | 0.04    | 0.36    | 0.41       | 0.18       | VA10 | 0.07    | 0.21    | 0.29       | 0.11       |
| 30          | CA09              | 0.02    | 0.39    | 0.4        | 0.14              | R8B  | 0.06    | 0.32    | 0.33              | 0.13       | PLM  | 0.02    | 0.31              | 0.34       | 0.08       | R8B  | 0.06              | 0.31    | 0.35       | 0.16       | VA11              | 0.14    | 0.36    | 0.42       | 0.19       | R2A  | 0.03    | 0.21    | 0.28       | 0.11       |
| 31          | EF3               | 0.15    | 0.38    | 0.4        | 0.14              | DX2  | 0.07    | 0.32    | 0.32              | 0.1        | R2A  | 0.01    | 0.31              | 0.34       | 0.09       | VD13 | 0.11              | 0.31    | 0.34       | 0.16       | EF3               | 0.03    | 0.37    | 0.42       | 0.19       | EF3  | 0.23    | 0.21    | 0.28       | 0.11       |
| 32          | R1AL              | 0.11    | 0.39    | 0.4        | 0.13              | CA08 | 0.03    | 0.32    | 0.33              | 0.1        | PHA  | 0.06    | 0.31              | 0.34       | 0.09       | R2B  | 0.1               | 0.31    | 0.34       | 0.16       | R2B               | 0.17    | 0.35    | 0.42       | 0.2        | R3A  | 0.03    | 0.21    | 0.28       | 0.06       |
| 33          | PVZ               | 0.04    | 0.39    | 0.4        | 0.13              | R2A  | 0       | 0.32    | 0.33              | 0.1        | DA07 | 0.01    | 0.3               | 0.34       | 0.08       | R3A  | 0.05              | 0.31    | 0.33       | 0.15       | EF2               | 0.09    | 0.36    | 0.41       | 0.15       | PDA  | 0.05    | 0.21    | 0.27       | 0.05       |
| 34          | DX2               | 0.06    | 0.39    | 0.4        | 0.13              | VD12 | 0.02    | 0.31    | 0.33              | 0.11       | VD13 | 0.02    | 0.31              | 0.34       | 0.06       | CA08 | 0.01              | 0.31    | 0.33       | 0.15       | PDC               | 0.07    | 0.36    | 0.41       | 0.16       | VA12 | 0.04    | 0.21    | 0.28       | 0.05       |
| 35          | R3A               | 0.08    | 0.38    | 0.4        | 0.13              | R1AR | 0.02    | 0.32    | 0.33              | 0.11       | VA10 | 0.04    | 0.31              | 0.34       | 0.07       | R9B  | 0.11              | 0.3     | 0.34       | 0.15       | R3A               | 0.11    | 0.35    | 0.41       | 0.17       | DVA  | 0.07    | 0.21    | 0.27       | 0.05       |
| 36          | PDB               | 0.04    | 0.38    | 0.41       | 0.13              | HOA  | 0.12    | 0.32    | 0.33              | 0.11       | PCC  | 0.01    | 0.31              | 0.34       | 0.07       | R6A  | 0.04              | 0.31    | 0.33       | 0.14       | DVB               | 0.15    | 0.36    | 0.41       | 0.18       | EF1  | 0.02    | 0.23    | 0.26       | 0.05       |
| 37          | PLM               | 0.12    | 0.39    | 0.41       | 0.13              | PCC  | 0.05    | 0.32    | 0.33              | 0.06       | DB07 | 0.04    | 0.31              | 0.33       | 0.07       | R1AL | 0.06              | 0.31    | 0.33       | 0.15       | PLM               | 0.15    | 0.35    | 0.41       | 0.15       | R2B  | 0.06    | 0.21    | 0.25       | 0.05       |
| 38          | PHD               | 0.02    | 0.38    | 0.41       | 0.11              | PVPR | 0.05    | 0.32    | 0.34              | 0.06       | R4A  | 0.04    | 0.3               | 0.33       | 0.07       | RIAR | 0.09              | 0.31    | 0.33       | 0.15       | SPD               | 0.06    | 0.36    | 0.4        | 0.14       | VD11 | 0.07    | 0.22    | 0.24       | 0.05       |
| 39          | HOA               | 0.04    | 0.39    | 0.41       | 0.11              | HOB  | 0.02    | 0.32    | 0.33              | 0.04       | R8B  | 0.02    | 0.31              | 0.33       | 0.06       | DD06 | 0.03              | 0.31    | 0.34       | 0.15       | EF1               | 0.01    | 0.36    | 0.41       | 0.12       | R1B  | 0.1     | 0.21    | 0.25       | 0.06       |
| 40          | VA10              | 0.04    | 0.39    | 0.41       | 0.1               | CA09 | 0.06    | 0.32    | 0.33              | 0.05       | PDB  | 0.02    | 0.3               | 0.33       | 0.07       | EF1  | 0.09              | 0.31    | 0.33       | 0.15       | AS11              | 0.09    | 0.36    | 0.41       | 0.11       | HOB  | 0.09    | 0.22    | 0.25       | 0.07       |
| 41          | CA08              | 0.14    | 0.39    | 0.41       | 0.11              | R2B  | 0       | 0.32    | 0.33              | 0.03       | VD11 | 0.05    | 0.31              | 0.33       | 0.05       | PVZ  | 0.1               | 0.3     | 0.34       | 0.14       | PCA               | 0.03    | 0.36    | 0.41       | 0.1        | DB07 | 0.05    | 0.21    | 0.25       | 0.08       |
| 42          | PCC               | 0.03    | 0.39    | 0.41       | 0.05              | PGA  | 0.05    | 0.32    | 0.33              | 0.03       | EF3  | 0.03    | 0.31              | 0.33       | 0.04       | EF3  | 0.06              | 0.31    | 0.34       | 0.13       | VD13              | 0.08    | 0.36    | 0.41       | 0.11       | R8B  | 0.08    | 0.21    | 0.24       | 0.09       |
| 43          | PDC               | 0.02    | 0.39    | 0.41       | 0.05              | EF1  | 0.02    | 0.32    | 0.33              | 0.04       | CA09 | 0.04    | 0.31              | 0.33       | 0.04       | im9R | 0.06              | 0.31    | 0.34       | 0.13       | VD11              | 0.05    | 0.36    | 0.4        | 0.12       | VD   |         |         |            |            |

**Table S5. State-specific correlations. Related to Figure 3.** We calculated cross-correlation matrices for each behavioral state and dataset. We compared Euclidean and correlation distances between these correlation matrices grouped by behavioral state or dataset to Euclidean and correlation distances between randomly selected matrices.

| Grouping          | Neuron-to-neuron correlations |                        |                          |                        | Neuron-to-behavior correlations |                        |                           |                        |
|-------------------|-------------------------------|------------------------|--------------------------|------------------------|---------------------------------|------------------------|---------------------------|------------------------|
|                   | Euclidean distance            |                        | Correlation distance     |                        | Euclidean distance              |                        | Correlation distance      |                        |
|                   | t statistic                   | FDR-corrected p-values | t statistic              | FDR-corrected p-values | t statistic                     | FDR-corrected p-values | t statistic               | FDR-corrected p-values |
| <b>By state</b>   |                               |                        |                          |                        |                                 |                        |                           |                        |
| Searching         | t(27.11)=-1.69, p=0.102       | p=0.136                | t(27.1)=-0.62, p=0.544   | p=0.544                | t(27.01)=-2.65, p=0.013         | p=0.018                | t(27.01)=-2.16, p=0.04    | p=0.053                |
| Scanning          | t(35.06)=-7.66, p<0.0001      | p<0.0001               | t(35.07)=-8.56, p<0.0001 | p<0.0001               | t(35.01)=-11.39, p<0.0001       | p<0.0001               | t(35.01)=-12.38, p<0.0001 | p<0.0001               |
| Copulation        | t(20.05)=-3.73, p=0.001       | p=0.003                | t(20.05)=-3.69, p=0.001  | p=0.003                | t(20.01)=0.08, p=0.938          | p=0.938                | t(20.01)=0.37, p=0.719    | p=0.719                |
| Resting           | t(20.11)=-0.09, p=0.929       | p=0.929                | t(20.11)=1, p=0.329      | p=0.438                | t(20.01)=-3.44, p=0.003         | p=0.005                | t(20.01)=-2.79, p=0.011   | p=0.022                |
| <b>By dataset</b> |                               |                        |                          |                        |                                 |                        |                           |                        |
| 1                 | t(5.02)=0.35, p=0.74          | p=0.864                | t(5.02)=0.48, p=0.651    | p=0.896                | t(5)=-0.21, p=0.84              | p=0.840                | t(5)=0.22, p=0.837        | p=0.837                |
| 3                 | t(5.03)=-0.42, p=0.691        | p=0.864                | t(5.02)=-0.16, p=0.876   | p=0.896                | t(5)=-1.28, p=0.257             | p=0.762                | t(5)=-1.26, p=0.264       | p=0.788                |
| 5                 | t(5)=-1.31, p=0.247           | p=0.576                | t(5)=-1.78, p=0.136      | p=0.460                | t(5)=0.29, p=0.784              | p=0.840                | t(5)=0.64, p=0.553        | p=0.788                |
| 6                 | t(5.05)=-0.14, p=0.893        | p=0.893                | t(5.04)=0.14, p=0.896    | p=0.896                | t(5)=-0.65, p=0.544             | p=0.762                | t(5)=-0.44, p=0.677       | p=0.790                |
| 7                 | t(5)=-0.66, p=0.539           | p=0.864                | t(5)=-0.96, p=0.383      | p=0.670                | t(5)=-0.86, p=0.429             | p=0.762                | t(5)=-1.05, p=0.343       | p=0.788                |
| 8                 | t(2.01)=-3.14, p=0.088        | p=0.324                | t(2.01)=-3.28, p=0.081   | p=0.460                | t(2)=0.8, p=0.506               | p=0.762                | t(2)=0.69, p=0.563        | p=0.788                |
| 9                 | t(5.07)=-2.07, p=0.093        | p=0.324                | t(5.07)=-1.48, p=0.197   | p=0.460                | t(5)=0.88, p=0.419              | p=0.762                | t(5)=1.05, p=0.34         | p=0.788                |

**Table S6. Community interaction motifs across different circuit partitioning schemes. Related to Figure 4.** Synaptic interaction motifs between functional communities delineated with link clustering. The fraction of assortative ("a"), disassortative ("d"), and core-periphery ("cp") motifs was calculated for 10 different partitioning schemes. For comparison, we calculated community interaction motifs when the community membership was shuffled. Empirical probability that the fraction of assortative and disassortative interactions from 1000 shuffled iterations ( $S_a$  and  $S_d$  respectively) is larger than the fraction of observed assortative and disassortative interactions ( $O_a$  and  $O_d$ ).

| number of communities | observed |      |      | shuffled |      |      | probability |             |  |
|-----------------------|----------|------|------|----------|------|------|-------------|-------------|--|
|                       | a        | d    | cp   | a        | d    | cp   | $S_a > O_a$ | $S_d > O_d$ |  |
| Electrical            |          |      |      |          |      |      |             |             |  |
| 7                     | 0.86     | 0.1  | 0.05 | 0.15     | 0.36 | 0.5  | 0           | 0.937       |  |
| 8                     | 0.86     | 0.07 | 0.07 | 0.14     | 0.37 | 0.49 | 0           | 0.973       |  |
| 9                     | 0.83     | 0.06 | 0.11 | 0.14     | 0.37 | 0.49 | 0           | 0.993       |  |
| 11                    | 0.84     | 0.05 | 0.11 | 0.14     | 0.37 | 0.49 | 0           | 1           |  |
| 13                    | 0.73     | 0.06 | 0.21 | 0.14     | 0.39 | 0.47 | 0           | 1           |  |
| 15                    | 0.76     | 0.05 | 0.2  | 0.14     | 0.4  | 0.46 | 0           | 1           |  |
| 16                    | 0.76     | 0.04 | 0.2  | 0.14     | 0.4  | 0.46 | 0           | 1           |  |
| 17                    | 0.75     | 0.04 | 0.21 | 0.14     | 0.39 | 0.47 | 0           | 1           |  |
| 18                    | 0.76     | 0.04 | 0.2  | 0.14     | 0.4  | 0.47 | 0           | 1           |  |
| 19                    | 0.76     | 0.03 | 0.2  | 0.14     | 0.38 | 0.48 | 0           | 1           |  |
| Chemical              |          |      |      |          |      |      |             |             |  |
| 7                     | 0.33     | 0.14 | 0.52 | 0.15     | 0.36 | 0.49 | 0.057       | 0.877       |  |
| 8                     | 0.29     | 0.18 | 0.54 | 0.15     | 0.36 | 0.49 | 0.09        | 0.87        |  |
| 9                     | 0.28     | 0.14 | 0.58 | 0.14     | 0.37 | 0.49 | 0.084       | 0.937       |  |
| 11                    | 0.44     | 0.13 | 0.44 | 0.14     | 0.37 | 0.49 | 0.002       | 0.98        |  |
| 13                    | 0.43     | 0.1  | 0.47 | 0.14     | 0.38 | 0.48 | 0.002       | 1           |  |
| 15                    | 0.47     | 0.13 | 0.4  | 0.13     | 0.41 | 0.46 | 0           | 0.997       |  |
| 16                    | 0.45     | 0.12 | 0.43 | 0.14     | 0.4  | 0.47 | 0           | 0.998       |  |
| 17                    | 0.46     | 0.1  | 0.44 | 0.14     | 0.39 | 0.47 | 0           | 1           |  |
| 18                    | 0.47     | 0.09 | 0.44 | 0.14     | 0.39 | 0.48 | 0           | 1           |  |
| 19                    | 0.48     | 0.1  | 0.42 | 0.14     | 0.38 | 0.48 | 0           | 0.999       |  |
